# Supplementary material
Source: PubMed Central journal article supplement (PMC8152509)
Supplement: advancesADV2021004347-suppl1.pdf [file advancesADV2021004347-suppl1.pdf]

**Table S1.** Total number of pathology reports reviewed, clinical consideration for lymphoma and unique patient cases included in the study. In order to preserve tissue for future clinical needs, cases were excluded from the final cohort if blocks were <1 cm<sup>3</sup>.

| <b>Year</b>  | <b>Total pathology reports reviewed</b> | <b>Pathology reports from cases considered for lymphoma</b> | <b>Unique patients with pathology reports considered for lymphoma</b> |
|--------------|-----------------------------------------|-------------------------------------------------------------|-----------------------------------------------------------------------|
| 2018         | 18                                      | 18                                                          | 13                                                                    |
| 2017         | 7045                                    | 304                                                         | 167                                                                   |
| 2016         | 8551                                    | 319                                                         | 203                                                                   |
| 2015         | 7702                                    | 333                                                         | 185                                                                   |
| 2014         | 8293                                    | 264                                                         | 188                                                                   |
| 2013         | 8400                                    | 198                                                         | 143                                                                   |
| 2012         | 8531                                    | 218                                                         | 134                                                                   |
| 2011         | 7000                                    | 194                                                         | 132                                                                   |
| 2010         | 7942                                    | 215                                                         | 142                                                                   |
| 2009         | 8080                                    | 201                                                         | 109                                                                   |
| 2008         | 7691                                    | 267                                                         | 135                                                                   |
| 2007         | 7025                                    | 245                                                         | 139                                                                   |
| 2006         | 7250                                    | 239                                                         | 146                                                                   |
| <b>Total</b> | <b>93528</b>                            | <b>3015</b>                                                 | <b>1836</b>                                                           |

**Table S2. A.** WHO classification of 645 cases with corresponding chemical ligation-dependent probe amplification (CLPA) diagnostic bin. Patients whose samples failed the CLPA assay are also included. **B.** 32 additional malignant cases that passed QC and had a definitive WHO classification but were excluded from modeling due to low numbers for each entity with distinct biology.

**A**

| <b>WHO Classification</b>                                               | <b>CLPA Diagnostic Bin</b> | <b>N</b> |
|-------------------------------------------------------------------------|----------------------------|----------|
| B lymphoblastic leukemia/lymphoma                                       | Agg BCL                    | 5        |
| Burkitt lymphoma                                                        | Agg BCL                    | 5        |
| Diffuse large B cell lymphoma, germinal center type                     | DLBCL                      | 68       |
| Diffuse large B cell lymphoma, non-germinal center type                 | DLBCL                      | 152      |
| Diffuse large B cell lymphoma, NOS                                      | DLBCL                      | 7        |
| EBV positive diffuse large B cell lymphoma, NOS                         | DLBCL                      | 5        |
| High grade B cell lymphoma, NOS                                         | DLBCL                      | 15       |
| High grade B cell lymphoma, Myc failed                                  | DLBCL                      | 2        |
| High grade B cell lymphoma with Myc and BCL2 or BCL6                    | DLBCL                      | 9        |
| T cell histocyte rich large B cell lymphoma                             | DLBCL                      | 5        |
| Follicular lymphoma, grade 1-2                                          | FL                         | 40       |
| Follicular lymphoma, grade 3                                            | FL                         | 11       |
| Classic Hodgkin lymphoma                                                | HL                         | 91       |
| Nodular lymphocyte-predominant Hodgkin lymphoma                         | HL                         | 6        |
| Mantle cell lymphoma                                                    | MCL                        | 63       |
| Marginal zone lymphoma                                                  | MZL                        | 23       |
| Extranodal NK/T cell lymphoma, nasal type                               | NKTCL                      | 54       |
| Anaplastic large cell lymphoma, ALK-negative                            | TCL                        | 7        |
| Anaplastic large cell lymphoma, ALK-positive                            | TCL                        | 6        |
| Angioimmunoblastic T cell lymphoma                                      | TCL                        | 1        |
| CD30 positive lymphoproliferative disorder                              | TCL                        | 2        |
| Mycosis Fungoides                                                       | TCL                        | 1        |
| Nodal peripheral T cell lymphoma with T follicular helper phenotype     | TCL                        | 2        |
| Peripheral T cell lymphoma, NOS                                         | TCL                        | 19       |
| Primary cutaneous CD4+ small/medium T-cell lymphoproliferative disorder | TCL                        | 1        |
| <b>Nonmalignant cases</b>                                               |                            |          |
| Acute inflammation with ulceration                                      | Nonmalignant               | 1        |
| Adipose tissue                                                          | Nonmalignant               | 1        |
| Angiomyomatous hamartoma                                                | Nonmalignant               | 1        |

|                                                |                        |            |
|------------------------------------------------|------------------------|------------|
| Chronic gastritis                              | Nonmalignant           | 2          |
| Chronic inflammation                           | Nonmalignant           | 1          |
| Dermatitis                                     | Nonmalignant           | 1          |
| Fibroconnective tissue                         | Nonmalignant           | 2          |
| Fragmented lymphoid tissue                     | Nonmalignant           | 1          |
| Granulomatous inflammation                     | Nonmalignant           | 1          |
| Non-lesional tissue identified                 | Nonmalignant           | 1          |
| Progressive transformation of germinal centers | Nonmalignant           | 1          |
| Reactive follicular hyperplasia                | Nonmalignant           | 29         |
| Reactive lymphoid infiltrate                   | Nonmalignant           | 1          |
| Reactive lymphoid hyperplasia                  | Nonmalignant           | 1          |
| Normal skin                                    | Nonmalignant           | 1          |
|                                                | <b>Total Diagnoses</b> | <b>645</b> |

**B**

| <b>WHO Classification</b>                    | <b>CLPA Diagnostic Bin</b> | <b>N</b>  |
|----------------------------------------------|----------------------------|-----------|
| Blastic plasmacytoid dendritic cell neoplasm | Excluded                   | 1         |
| Carcinoma                                    | Excluded                   | 3         |
| CLL/SLL                                      | Excluded                   | 14        |
| Neuroectoderm                                | Excluded                   | 1         |
| Plasma cell neoplasm                         | Excluded                   | 7         |
| Plasmablastic lymphoma                       | Excluded                   | 1         |
| T-lymphoblastic lymphoma                     | Excluded                   | 5         |
|                                              | <b>Total Excluded</b>      | <b>32</b> |

**Table S3.** Comparison of blinded diagnoses utilizing H&E of whole section followed by IHC on tissue microarray (TMA) versus H&E and IHC on whole sections (n=80 cases). Two cases were excluded because of inadequate tissue. Percent tumor cell involvement was estimated from whole sections.

| Case  | % Tumor Cells | TMA Diagnosis                | Whole Slide Diagnosis                                                    | Concordant | Comment                                                                     |
|-------|---------------|------------------------------|--------------------------------------------------------------------------|------------|-----------------------------------------------------------------------------|
| E0010 | 95            | DLBCL, non-GC type           | DLBCL, non-GC type                                                       | Y          |                                                                             |
| E0023 | 80            | DLBCL, GC type               | DLBCL, GC type                                                           | Y          |                                                                             |
| E0029 | 1             | PTCL, NOS                    | Nodular lymphocyte predominant Hodgkin lymphoma                          | N          | Rare large CD20+ cells noted on IHC of whole section and not sampled in TMA |
| E0035 | 50            | DLBCL, GC type               | DLBCL, GC type                                                           | Y          |                                                                             |
| E0061 | 90            | DLBCL, GC type               | DLBCL, GC type                                                           | Y          |                                                                             |
| E0065 | 90            | Mantle cell lymphoma         | Mantle cell lymphoma                                                     | Y          |                                                                             |
| E0076 | 50            | DLBCL, non-GC type           | DLBCL, non-GC type                                                       | Y          |                                                                             |
| E0085 | 20            | ALCL, ALK positive           | ALCL, ALK-positive                                                       | Y          |                                                                             |
| E0100 | 90            | DLBCL, non-GC type           | DLBCL, non-GC type                                                       | Y          |                                                                             |
| E0107 | 90            | Burkitt lymphoma             | High grade B cell lymphoma, NOS (favor Burkitt lymphoma)                 | Y          |                                                                             |
| E0109 | 80            | DLBCL, non-GC type           | DLBCL, non-GC type                                                       | Y          |                                                                             |
| E0115 | 95            | DLBCL, GC type               | DLBCL, GC type                                                           | Y          |                                                                             |
| E0127 | 90            | DLBCL, non-GC type           | DLBCL, non-GC type                                                       | Y          |                                                                             |
| E0154 | 50            | DLBCL, GC type               | DLBCL, GC type                                                           | Y          |                                                                             |
| E0178 | 80            | DLBCL, non-GC type           | DLBCL arising from marginal zone lymphoma                                | Y          |                                                                             |
| E0186 | 95            | Mantle cell lymphoma         | Mantle cell lymphoma                                                     | Y          |                                                                             |
| E0199 | 30            | DLBCL, non-GC type           | DLBCL, non-GC type                                                       | Y          |                                                                             |
| E0227 | 80            | Mantle cell lymphoma         | Mantle cell lymphoma                                                     | Y          |                                                                             |
| E0236 | 90            | DLBCL, GC type               | DLBCL, GC type (20%) arising from grade 3 FL (80%)                       | Y          |                                                                             |
| E0260 | 80            | DLBCL, non-GC type           | DLBCL, non-GC type                                                       | Y          |                                                                             |
| E0275 | 20            | DLBCL, non-GC type           | Limited tissue                                                           | N/A        | Limited tissue on whole section IHC                                         |
| E0317 | N/A           | Non-lymphoid tissue          | Non-lymphoid tissue                                                      | Y          |                                                                             |
| E0322 | 25            | DLBCL, non-GC type           | DLBCL, GC type                                                           | Y          |                                                                             |
| E0334 | 1             | Classical Hodgkin Lymphoma   | Classical Hodgkin lymphoma                                               | Y          |                                                                             |
| E0337 | 60            | Follicular lymphoma, grade 3 | Follicular lymphoma, grade 3 (10%); follicular lymphoma, grade 1-2 (90%) | Y          |                                                                             |
| E0343 | 80            | DLBCL, non-GC type           | DLBCL, non-GC type                                                       | Y          |                                                                             |
| E0378 | 90            | Mantle cell lymphoma         | Mantle cell lymphoma                                                     | Y          |                                                                             |
| E0380 | 90            | Marginal zone lymphoma       | Marginal zone lymphoma                                                   | Y          |                                                                             |

|       |    |                                                                      |                                                                 |   |                                                                                                                                 |
|-------|----|----------------------------------------------------------------------|-----------------------------------------------------------------|---|---------------------------------------------------------------------------------------------------------------------------------|
| E0381 | 1  | Nodular lymphocyte predominant Hodgkin lymphoma with variant pattern | T cell histiocyte rich large B cell lymphoma arising from NLPHL | Y | On TMA, there is one large B cell nodule, so this is probably TCHRLB arising from NLPHL; this represents a biological continuum |
| E0397 | 80 | DLBCL, non-GC type                                                   | DLBCL, non-GC type                                              | Y |                                                                                                                                 |
| E0442 | 40 | DLBCL, non-GC type                                                   | DLBCL, non-GC type (80%) evolving from grade 3B FL (2%)         | Y |                                                                                                                                 |
| E0444 | 80 | DLBCL, GC type                                                       | DLBCL, GC type (80%) evolving from grade 3B FL (2%)             | Y |                                                                                                                                 |
| E0511 | 90 | Plasma cell neoplasm                                                 | Pleomorphic plasma cell neoplasm                                | Y |                                                                                                                                 |
| E0522 | 50 | ENKTL, nasal type                                                    | ENKTL, nasal type                                               | Y |                                                                                                                                 |
| E0525 | 1  | Classical Hodgkin Lymphoma                                           | Classical Hodgkin lymphoma                                      | Y |                                                                                                                                 |
| E0564 | 2  | Classical Hodgkin Lymphoma                                           | Classical Hodgkin lymphoma                                      | Y |                                                                                                                                 |
| E0571 | 80 | Mantle cell lymphoma                                                 | Mantle cell lymphoma                                            | Y |                                                                                                                                 |
| E0597 | 95 | Burkitt lymphoma                                                     | High grade B cell lymphoma, NOS (favor Burkitt lymphoma)        | Y |                                                                                                                                 |
| E0601 | 60 | PTCL, NOS                                                            | PTCL/CD30+ lymphoproliferative disorder                         | Y |                                                                                                                                 |
| E0602 | 2  | Classical Hodgkin lymphoma                                           | Classical Hodgkin lymphoma                                      | Y |                                                                                                                                 |
| E0604 | 90 | Follicular lymphoma, grade 1-2                                       | Follicular lymphoma, grade 1-2                                  | Y |                                                                                                                                 |
| E0609 | 90 | DLBCL, GC type                                                       | DLBCL, GC type                                                  | Y |                                                                                                                                 |
| E0610 | 70 | DLBCL, non-GC type                                                   | DLBCL, non-GC type                                              | Y |                                                                                                                                 |
| E0612 | 80 | DLBCL, non-GC type                                                   | DLBCL, non-GC type                                              | Y |                                                                                                                                 |
| E0641 | 20 | Follicular lymphoma, grade 1-2                                       | CD10+ small B cell lymphoma, favor follicular lymphoma          | Y |                                                                                                                                 |
| E0650 | 5  | Classical Hodgkin lymphoma                                           | Classical Hodgkin lymphoma                                      | Y |                                                                                                                                 |
| E0658 | 5  | Classical Hodgkin Lymphoma                                           | Classical Hodgkin lymphoma                                      | Y |                                                                                                                                 |
| E0679 | 90 | DLBCL, non-GC type                                                   | DLBCL, non-GC type                                              | Y |                                                                                                                                 |
| E0709 | 80 | DLBCL, GC type                                                       | DLBCL, GC type (10%) evolving from grade 3 FL (90%)             | Y |                                                                                                                                 |
| E0725 | 20 | Classical Hodgkin Lymphoma                                           | Classical Hodgkin lymphoma                                      | Y |                                                                                                                                 |
| E0736 | 80 | Follicular lymphoma, grade 1-2                                       | Follicular lymphoma, grade 1-2                                  | Y |                                                                                                                                 |
| E0743 | 50 | Marginal zone lymphoma                                               | Marginal zone lymphoma                                          | Y |                                                                                                                                 |
| E0744 | 80 | Follicular lymphoma, grade 3                                         | Follicular lymphoma, grade 3A                                   | Y |                                                                                                                                 |
| E0748 | 20 | PTCL, NOS                                                            | PTCL, NOS                                                       | Y |                                                                                                                                 |
| E0749 | 70 | DLBCL, non-GC type                                                   | DLBCL, non-GC type                                              | Y |                                                                                                                                 |
| E0770 | 80 | DLBCL, non-GC type                                                   | DLBCL, non-GC type                                              | Y |                                                                                                                                 |
| E0776 | 90 | Mantle cell lymphoma                                                 | Mantle cell lymphoma                                            | Y |                                                                                                                                 |
| E0803 | 80 | DLBCL, non-GC type                                                   | DLBCL, non-GC type                                              | Y |                                                                                                                                 |

|       |     |                                                                                    |                                    |     |                            |
|-------|-----|------------------------------------------------------------------------------------|------------------------------------|-----|----------------------------|
| E0814 | 80  | Mantle cell lymphoma                                                               | Mantle cell lymphoma               | Y   |                            |
| E0821 | 30  | ALCL, ALK positive                                                                 | ALCL, ALK-positive                 | Y   |                            |
| E0829 | 90  | DLBCL, non-GC type                                                                 | DLBCL, non-GC type                 | Y   |                            |
| E0853 | 80  | DLBCL, non-GC type                                                                 | DLBCL, non-GC type                 | Y   |                            |
| E0872 | 90  | DLBCL, GC type by IHC.<br>FISH showed <i>MYC</i> and <i>BCL2</i><br>rearrangements | DLBCL, GC type (FISH unsuccessful) | Y   |                            |
| E0877 | 90  | DLBCL, non-GC type                                                                 | DLBCL, non-GC type                 | Y   |                            |
| E0886 | 70  | DLBCL, non-GC type                                                                 | DLBCL, non-GC type                 | Y   |                            |
| E0928 | 70  | DLBCL, non-GC type                                                                 | DLBCL, non-GC type                 | Y   |                            |
| E0930 | 70  | Mantle cell lymphoma                                                               | Mantle cell lymphoma               | Y   |                            |
| E0939 | 0   | Reactive follicular hyperplasia                                                    | Reactive follicular hyperplasia    | Y   |                            |
| E0940 | 0   | Reactive follicular hyperplasia                                                    | Reactive follicular hyperplasia    | Y   |                            |
| E0941 | 0   | Reactive follicular hyperplasia                                                    | Reactive follicular hyperplasia    | Y   |                            |
| E0946 | 0   | Reactive follicular hyperplasia                                                    | Reactive follicular hyperplasia    | Y   |                            |
| E0953 | 0   | Reactive follicular hyperplasia                                                    | Reactive follicular hyperplasia    | Y   |                            |
| E0962 | 10  | ENKTL, nasal type                                                                  | ENKTL, nasal type                  | Y   |                            |
| E0964 | N/A | PTCL, NOS                                                                          | Non-diagnostic: scant tissue       | N/A | No tissue to stain for IHC |
| E0974 | 60  | ENKTL, nasal type                                                                  | ENKTL, nasal type                  | Y   |                            |
| E0975 | 80  | ENKTL, nasal type                                                                  | ENKTL, nasal type                  | Y   |                            |
| E0980 | 5   | ENKTL, nasal type                                                                  | ENKTL, nasal type                  | Y   |                            |
| E0987 | 60  | ENKTL, nasal type                                                                  | ENKTL, nasal type                  | Y   |                            |
| E0991 | 60  | ENKTL, nasal type                                                                  | ENKTL, nasal type                  | Y   |                            |
| E0992 | N/A | Non-lesional tissue                                                                | Non-lesional tissue                | Y   |                            |

**Table S4. Characteristics of the 643 individual patients who underwent biopsy for suspected lymphoma in the pre-treatment or post-relapse setting.** Patients whose samples failed the CLPA assay are also included. Two patients had both a pre-treatment and relapse tissue sample. Only the pre-treatment characteristics are included here.

|                       | <b>Agg BCL</b> | <b>DLBCL</b>  | <b>FL</b>     | <b>HL</b>    | <b>MCL</b>    | <b>MZL</b>    | <b>NKTCL</b>  | <b>Nonmalignant</b> | <b>TCL</b>    |
|-----------------------|----------------|---------------|---------------|--------------|---------------|---------------|---------------|---------------------|---------------|
| N                     | 10             | 262           | 50            | 97           | 63            | 23            | 54            | 45                  | 39            |
| Median age<br>(range) | 38<br>(18-60)  | 63<br>(15-98) | 59<br>(30-85) | 38<br>(8-90) | 62<br>(39-89) | 53<br>(22-78) | 41<br>(15-84) | 48<br>(19-79)       | 56<br>(15-87) |
| Sex (%)               |                |               |               |              |               |               |               |                     |               |
| Female                | 5 (50)         | 140 (53)      | 26 (52)       | 43 (44)      | 14 (22)       | 15 (65)       | 18 (34)       | 18 (40)             | 11 (28)       |
| Male                  | 5 (50)         | 119 (45)      | 21 (42)       | 53 (55)      | 49 (78)       | 8 (35)        | 32 (59)       | 7 (16)              | 27 (69)       |
| Unknown               | 0 (0)          | 3 (1)         | 3 (6)         | 1 (1)        | 0 (0)         | 0 (0)         | 4 (7)         | 20 (44)             | 1 (3)         |
| Stage (%)             |                |               |               |              |               |               |               |                     |               |
| I                     | 0 (0)          | 51 (19)       | 6 (12)        | 19 (20)      | 1 (2)         | 5 (22)        | 18 (33)       | 6 (13)              | 8 (21)        |
| II                    | 0 (0)          | 60 (23)       | 11 (22)       | 31 (32)      | 10 (16)       | 4 (17)        | 20 (37)       | 5 (11)              | 7 (18)        |
| III                   | 2 (20)         | 57 (22)       | 14 (28)       | 23 (24)      | 19 (30)       | 10 (43)       | 0 (0)         | 4 (9)               | 5 (13)        |
| IV                    | 5 (50)         | 41 (16)       | 6 (12)        | 9 (9)        | 25 (40)       | 2 (9)         | 5 (9)         | 0 (0)               | 9 (23)        |
| Unknown               | 3 (30)         | 53 (20)       | 13 (26)       | 15 (15)      | 8 (13)        | 2 (9)         | 11 (20)       | 30 (67)             | 10 (26)       |
| B symptoms (%)        |                |               |               |              |               |               |               |                     |               |
| Yes                   | 4 (40)         | 88 (34)       | 11 (22)       | 49 (51)      | 30 (48)       | 8 (35)        | 15 (28)       | 1 (2)               | 11 (28)       |
| No                    | 3 (30)         | 120 (46)      | 26 (52)       | 33 (34)      | 25 (40)       | 13 (57)       | 27 (50)       | 14 (31)             | 19 (49)       |
| Unknown               | 3 (30)         | 54 (21)       | 13 (26)       | 15 (15)      | 8 (13)        | 2 (9)         | 12 (22)       | 30 (67)             | 9 (23)        |
| Bulky (%)             |                |               |               |              |               |               |               |                     |               |
| Yes                   | 3 (30)         | 113 (43)      | 15 (30)       | 47 (48)      | 30 (48)       | 3 (13)        | 16 (30)       | 2 (4)               | 13 (33)       |
| No                    | 4 (40)         | 94 (36)       | 22 (44)       | 33 (34)      | 23 (37)       | 18 (78)       | 18 (33)       | 12 (27)             | 16 (41)       |
| Unknown               | 3 (30)         | 55 (21)       | 13 (26)       | 17 (18)      | 10 (16)       | 2 (9)         | 20 (37)       | 31 (69)             | 10 (26)       |

**Table S5. Individual diagnostic, clinical characteristics and treatment.** Diagnosis at INCAN was obtained based on H&E staining with or without immunohistochemistry (IHC), as indicated in column C. Stanford diagnoses were based on the 2016 WHO classification as outlined in the Methods. Column E compares the diagnosis between INCAN and Stanford. "FULL" concordance indicates an identical finalized diagnosis. "PARTIAL" concordance indicates cases where the INCAN diagnosis and the Stanford diagnosis were within similar but not identical morphologic groupings. Any case in which the cell lineage between B, T, and NK cell lymphoma were discordant were considered completely discordant and indicated by "NONE." Lymphoma bin indicates the diagnostic bin for each case based on the Stanford diagnosis. Chemical ligation-dependent probe amplification (CLPA) diagnosis indicates the highest probability bin as indicated by the CLPA assay. In Column H, cases are classified as "indeterminate" if the CLPA probability call was <60%, "Yes" if the CLPA diagnosis differed from the INCAN diagnosis, and "No" if the CLPA diagnosis was identical to the INCAN diagnosis. Departments in Guatemala (Column M) are synonymous with states or provinces. Stage at diagnosis is based on review of the medical record and imaging but patients may have been understaged based on incomplete imaging or bone marrow assessment. HIV, Hepatitis B (HBsAb) and Hepatitis C (HCV Ab) status were based on antibody testing. The prognostic index was determined based upon the patient's original diagnosis and appropriate risk scoring system (IPI for DLBCL, PTCL, NKTCL, and MZL, MIPI for MCL, FLIPI for FL, Hasenclever for HL). Abbreviations: follicular lymphoma (FL), diffuse large B cell lymphoma (DLBCL), peripheral T cell lymphoma (PTCL), mantle cell lymphoma (MCL), aggressive B-cell lymphoma (AGG\_BCL), Hodgkin lymphoma (HL), extranodal NK/T cell lymphoma (NKTCL), anaplastic large cell lymphoma (ALCL), cyclophosphamide/daunorubicin/vincristine/prednisone (CHOP), doxorubicin/bleomycin/vinblastine/dacarbazine (ABVD), gemcitabine/cyclophosphamide/vincristine/prednisone (GCVP), cyclophosphamide/vincristine/prednisone (CVP), dexamethasone/high dose cytarabine/cisplatin (DHAP), dexamethasone/methotrexate/ifosfamide/L-asparaginase/etoposide (SMILE) and rituximab (R).

**See attached .xls file**



**Table S6. Concordance for 643 patient samples obtained for suspicion of lymphoma and assessed at both INCAN and Stanford.** At INCAN, samples were evaluated by hematoxylin and eosin (H&E) staining alone or H&E with IHC. At Stanford, all samples were evaluated using H&E and IHC, as well as FISH in a subset. Gray boxes are considered concordant. In some cases, it was not possible to ensure concordance; for example, high-grade BCL at INCAN does not distinguish between lymphomas like Burkitt or LBL (which were included in the Agg BCL bin) and DLBCL. Overall, 244 (38%; 95% CI: 34-42%) were concordant. Additional abbreviations: CLL/SLL, chronic lymphocytic leukemia/small lymphocytic lymphoma; INC, incomplete diagnosis; T-LL, T-cell lymphoblastic lymphoma.

| INCAN        | Stanford |       |    |    |     |     |        |              |     |       |
|--------------|----------|-------|----|----|-----|-----|--------|--------------|-----|-------|
| Frequency    | AGG BCL  | DLBCL | FL | HL | MCL | MZL | NK-TCL | Nonmalignant | TCL | Total |
| AGG BCL      | 2        | 3     | 0  | 0  | 0   | 0   | 1      | 0            | 1   | 7     |
| CLL/SLL      | 0        | 1     | 0  | 0  | 0   | 1   | 0      | 0            | 0   | 2     |
| DLBCL        | 1        | 72    | 3  | 0  | 1   | 1   | 0      | 1            | 2   | 81    |
| FL           | 1        | 7     | 20 | 0  | 6   | 0   | 0      | 0            | 0   | 34    |
| HL           | 0        | 3     | 0  | 65 | 0   | 1   | 0      | 1            | 4   | 74    |
| INC          | 5        | 160   | 27 | 16 | 35  | 13  | 12     | 31           | 19  | 318   |
| MCL          | 0        | 1     | 0  | 0  | 20  | 0   | 0      | 0            | 0   | 21    |
| MZL          | 0        | 3     | 0  | 0  | 0   | 6   | 0      | 2            | 0   | 11    |
| NK-TCL       | 0        | 0     | 0  | 1  | 0   | 0   | 38     | 1            | 0   | 40    |
| Nonmalignant | 0        | 3     | 0  | 2  | 0   | 1   | 0      | 8            | 0   | 14    |
| T-LL         | 1        | 0     | 0  | 0  | 0   | 0   | 0      | 0            | 0   | 1     |
| TCL          | 0        | 9     | 0  | 13 | 1   | 0   | 3      | 1            | 13  | 40    |
| Total        | 10       | 262   | 50 | 97 | 63  | 23  | 54     | 45           | 39  | 643   |

**Table S7.** Genes included in the CLPA-based assay and selected publications supporting their inclusion. Abbreviations and references are noted specifically below.

| <b>Gene/Protein</b>                    | <b>Gene Expression Discriminations</b>                                                                                                                                                       |
|----------------------------------------|----------------------------------------------------------------------------------------------------------------------------------------------------------------------------------------------|
| <i>FOXP1</i>                           | ABC-DLBCL vs GCB-DLBCL <sup>1-4</sup><br>BL and molecular high-grade vs GCB-DLBCL <sup>5</sup>                                                                                               |
| <i>TNFRSF13B/</i><br><i>CD267/TACI</i> | ABC-DLBCL vs GCB-DLBCL <sup>6,7</sup> and PMBCL <sup>2</sup><br>MYC+/BCL2+ vs MYC-/BCL2- DLBCL <sup>8</sup><br>NMZL vs FL and reactive lymph node <sup>9</sup>                               |
| <i>IGHM</i>                            | ABC-DLBCL vs GCB-DLBCL <sup>1,6</sup> and PMBCL <sup>2</sup>                                                                                                                                 |
| <i>IRF4/MUM1</i>                       | ABC-DLBCL and PMBCL <sup>2</sup> vs GCB-DLBCL <sup>1,3,7,10</sup><br>DLBCL vs Burkitts <sup>11</sup><br>NMZL vs FL and reactive lymph node <sup>9</sup>                                      |
| <i>BCL6</i>                            | GCB-DLBC vs ABC-DLBCL <sup>1,3,6,8</sup><br>FL vs NMZL <sup>9</sup> .<br>AITL vs ALCL, ATLL, NKTCL, PTC-NOS <sup>12</sup><br>ALK+ vs ALK- ALCL <sup>13</sup>                                 |
| <i>NEK6</i>                            | GCB-DLBCL and PMBCL <sup>2</sup> vs ABC DLBCL <sup>6</sup><br>AITL vs ALCL, ATLL, NKTCL, PTC-NOS <sup>12</sup>                                                                               |
| <i>LMO2</i>                            | GCB-DLBCL and PMBCL vs ABC-DLBCL <sup>1-3,6,10,14,15</sup> and BL <sup>11</sup><br>FL and reactive lymph node vs NMZL <sup>9</sup><br>Reactive lymph node, cHL and DLBCL vs FL <sup>16</sup> |
| <i>MYBL1/AMYB</i>                      | GCB-DLBCL, vs ABC-DLBCL <sup>1,3,6,8</sup> and PMBCL <sup>2</sup><br>BL vs DLBCL <sup>11</sup>                                                                                               |
| <i>ALK</i>                             | ALK+ expression improves prognosis vs ALK- in ALCL and is therapeutic target <sup>13,17</sup><br>Poor prognosis in DLBCL <sup>18</sup>                                                       |
| <i>BCL2</i>                            | DLBCL vs BL <sup>11,19</sup><br>DLBCL vs PMBCL <sup>20</sup><br>AITL vs ALCL, ATLL, NKTCL/T, PTCL-NOS <sup>12</sup>                                                                          |
| <i>BCL2A1/BFL1</i>                     | PMBCL vs HL and DLBCL <sup>20</sup><br>DLBCL vs BL <sup>11,19,21,22</sup><br>AITL vs ALCL, ATLL, NKTCL, PTCL-NOS <sup>12</sup>                                                               |
| <i>BMP7</i>                            | BL vs DLBCL <sup>11,19</sup>                                                                                                                                                                 |
| <i>CCND1</i>                           | MCL vs SLL and MZL <sup>23</sup>                                                                                                                                                             |
| <i>CD244/NKR2B4</i>                    | NKTCL vs PTCL-NOS <sup>24</sup>                                                                                                                                                              |

|                   |                                                                                                                                                                         |
|-------------------|-------------------------------------------------------------------------------------------------------------------------------------------------------------------------|
|                   | NKTCL vs AITL, ATLL, ALCL <sup>25</sup><br>CT-PTCL vs ALK+ ALCL, ATLL, AITL <sup>12</sup>                                                                               |
| <i>CD44</i>       | PMBCL, DLBCL vs BL <sup>11,19,22</sup><br>ABC-DLBCL vs GCB-DLBCL <sup>10,20,26</sup><br>NMZL vs FL <sup>9</sup>                                                         |
| <i>DLEU1</i>      | BL vs DLBCL <sup>19,22</sup>                                                                                                                                            |
| <i>CD5</i>        | SLL and MCL vs NMZL and FL                                                                                                                                              |
| <i>CRBN</i>       | Potential biomarker for imides                                                                                                                                          |
| <i>EBER</i>       | NKTCL, DLBCL, HL, AITL and potential biomarker                                                                                                                          |
| <i>FCER2/CD23</i> | PMBCL vs DLBCL <sup>2</sup><br>SLL vs MCL, MZL<br>AITL vs ALCL, ATLL, NK/T, PTCL-NOS <sup>12</sup>                                                                      |
| <i>GATA3</i>      | PTCL-NOS with adverse prognosis <sup>25,27</sup><br>HL (cell lines) vs normal B cells, BL, FL, CLL <sup>28</sup><br>ATLL vs ALK+ALCL, ATLL, AITL, CT-PTCL <sup>12</sup> |
| <i>ICOS</i>       | AITL vs ALCL, ATLL, NKTCL, PTCL-NOS <sup>12</sup><br>PTCL vs NKTCL <sup>29</sup>                                                                                        |
| <i>ID3</i>        | AITL vs ALCL, ATLL, NKTCL, PTC-NOS <sup>12</sup><br>BL vs DLBCL <sup>11,21,30</sup>                                                                                     |
| <i>MAL</i>        | PMBCL vs DLBCL <sup>2</sup>                                                                                                                                             |
| <i>MKI67</i>      | MCL poor prognosis <sup>31</sup><br>Aggressive versus indolent                                                                                                          |
| <i>MME/CD10</i>   | GCB-DLBC vs ABC-DLBCL <sup>10,26</sup> and BL <sup>2,4,11,19,21</sup><br>FL vs NMZL <sup>9</sup>                                                                        |
| <i>MS4A1/CD20</i> | Mature B-cell lymphomas                                                                                                                                                 |
| <i>MYC/c-MYC</i>  | BL and poor prognosis DLBCL <sup>2,8,11,19,32-34</sup><br>NKTCL vs normal peripheral blood NK cells <sup>24</sup>                                                       |
| <i>NCAMI/CD56</i> | NKTCL vs PTCL <sup>24</sup>                                                                                                                                             |
| <i>NFKBIA</i>     | DLBCL vs BL <sup>11,19,21,30</sup>                                                                                                                                      |
| <i>PAX5</i>       | B-cell malignancies                                                                                                                                                     |
| <i>REL/c-Rel</i>  | PMBCL versus DLBCL <sup>4,14</sup>                                                                                                                                      |
| <i>SOX8</i>       | AITL vs ALCL, ATLL, NKTCL, PTCL-NOS <sup>12</sup>                                                                                                                       |
| <i>STAT3</i>      | DLBCL vs BL <sup>11,21,30</sup>                                                                                                                                         |
| <i>TBX21/TBET</i> | NKTCL vs PTCL <sup>24,29</sup><br>PTCL-NOS with better prognosis <sup>25</sup>                                                                                          |

|              |                                                                                           |
|--------------|-------------------------------------------------------------------------------------------|
| TCF3/E2A     | BL and molecular high-grade vs DLBCL <sup>19,21,30</sup>                                  |
| TNFRSF8/CD30 | ALCL and subset of other PTCL and CTCL <sup>12,25,29</sup><br>PMBCL vs DLBCL <sup>2</sup> |

#### Abbreviations:

|         |                                           |
|---------|-------------------------------------------|
| ABC     | activated B-cell                          |
| AITL    | angiimmunoblastic t-cell lymphoma         |
| ALCL    | anaplastic large-cell lymphoma            |
| ALK     | anaplastic lymphoma kinase                |
| ATLL    | adult t-cell leukemia/lymphoma            |
| BL      | Burkitt lymphoma                          |
| cHL     | classical Hodgkin lymphoma                |
| CT-PTCL | cytotoxic peripheral t-cell lymphoma      |
| CTCL    | cutaneous t-cell lymphoma                 |
| DLBCL   | diffuse large B-Cell Lymphoma             |
| FL      | follicular lymphoma                       |
| GCB     | germinal center B-cell                    |
| HL      | Hodgkin lymphoma                          |
| MCL     | mantle cell lymphoma                      |
| NKTCL   | natural killer/ t-cell lymphoma           |
| NMZL    | nodal marginal zone b-cell lymphoma       |
| NOS     | not otherwise specified                   |
| PMBCL   | primary mediastinal large B-cell lymphoma |
| PTCL    | peripheral t-cell lymphoma                |
| SLL     | small lymphocytic lymphoma/leukemia       |

#### References

1. Blenk S, Engelmann J, Weniger M, Schultz J, Dittrich M, Rosenwald A, Muller-Hermelink HK, Muller T, Dandekar T. Germinal center B cell-like (GCB) and activated B cell-like (ABC) type of diffuse large B cell lymphoma (DLBCL): analysis of molecular predictors, signatures, cell cycle state and patient survival. *Cancer Inform.* 2007;3:399-420.
2. Bobee V, Ruminy P, Marchand V, Viailly PJ, Abdel Sater A, Veresezan L, Drieux F, Berard C, Bohers E, Mareschal S, Dubois S, Jais JP, Leroy K, Figeac M, Picquenot JM, Molina TJ, Salles G, Haioun C, Tilly H, Jardin F. Determination of Molecular Subtypes of Diffuse Large B-Cell Lymphoma Using a Reverse Transcriptase Multiplex Ligation-Dependent Probe Amplification Classifier: A CALYM Study. *J Mol Diagn.* 2017;19(6):892-904.
3. Jais JP, Haioun C, Molina TJ, Rickman DS, de Reynies A, Berger F, Gisselbrecht C, Briere J, Reyes F, Gaulard P, Feugier P, Labouyrie E, Tilly H, Bastard C, Coiffier B, Salles G, Leroy K, Groupe d'Etude des Lymphomes de IA. The expression of 16 genes related to the cell of

origin and immune response predicts survival in elderly patients with diffuse large B-cell lymphoma treated with CHOP and rituximab. *Leukemia*. 2008;22(10):1917-1924.

4. Wright G, Tan B, Rosenwald A, Hurt EH, Wiestner A, Staudt LM. A gene expression-based method to diagnose clinically distinct subgroups of diffuse large B cell lymphoma. *Proc Natl Acad Sci U S A*. 2003;100(17):9991-9996.
5. Sha C, Barrans S, Cucco F, Bentley MA, Care MA, Cummin T, Kennedy H, Thompson JS, Uddin R, Worrillow L, Chalkley R, van Hoppe M, Ahmed S, Maishman T, Caddy J, Schuh A, Mamot C, Burton C, Tooze R, Davies A, Du MQ, Johnson PWM, Westhead DR. Molecular High-Grade B-Cell Lymphoma: Defining a Poor-Risk Group That Requires Different Approaches to Therapy. *J Clin Oncol*. 2019;37(3):202-212.
6. Mareschal S, Ruminy P, Bagacean C, Marchand V, Cornic M, Jais JP, Figeac M, Picquenot JM, Molina TJ, Fest T, Salles G, Haioun C, Leroy K, Tilly H, Jardin F. Accurate Classification of Germinal Center B-Cell-Like/Activated B-Cell-Like Diffuse Large B-Cell Lymphoma Using a Simple and Rapid Reverse Transcriptase-Multiplex Ligation-Dependent Probe Amplification Assay: A CALYM Study. *J Mol Diagn*. 2015.
7. Scott DW, Wright GW, Williams PM, Lih CJ, Walsh W, Jaffe ES, Rosenwald A, Campo E, Chan WC, Connors JM, Smeland EB, Mottok A, Braziel RM, Ott G, Delabie J, Tubbs RR, Cook JR, Weisenburger DD, Greiner TC, Glinzmann-Gibson BJ, Fu K, Staudt LM, Gascoyne RD, Rimsza LM. Determining cell-of-origin subtypes of diffuse large B-cell lymphoma using gene expression in formalin-fixed paraffin-embedded tissue. *Blood*. 2014;123(8):1214-1217.
8. Hu S, Xu-Monette ZY, Tzankov A, Green T, Wu L, Balasubramanyam A, Liu WM, Visco C, Li Y, Miranda RN, Montes-Moreno S, Dybkaer K, Chiu A, Orazi A, Zu Y, Bhagat G, Richards KL, Hsi ED, Choi WW, Zhao X, van Krieken JH, Huang Q, Huh J, Ai W, Ponzoni M, Ferreri AJ, Zhou F, Slack GW, Gascoyne RD, Tu M, Variakojis D, Chen W, Go RS, Piris MA, Moller MB, Medeiros LJ, Young KH. MYC/BCL2 protein coexpression contributes to the inferior survival of activated B-cell subtype of diffuse large B-cell lymphoma and demonstrates high-risk gene expression signatures: a report from The International DLBCL Rituximab-CHOP Consortium Program. *Blood*. 2013;121(20):4021-4031; quiz 4250.
9. Arribas AJ, Campos-Martin Y, Gomez-Abad C, Algara P, Sanchez-Beato M, Rodriguez-Pinilla MS, Montes-Moreno S, Martinez N, Alves-Ferreira J, Piris MA, Mollejo M. Nodal marginal zone lymphoma: gene expression and miRNA profiling identify diagnostic markers and potential therapeutic targets. *Blood*. 2012;119(3):e9-e21.
10. Alizadeh AA, Eisen MB, Davis RE, Ma C, Lossos IS, Rosenwald A, Boldrick JC, Sabet H, Tran T, Yu X, Powell JI, Yang L, Marti GE, Moore T, Hudson J, Jr., Lu L, Lewis DB, Tibshirani R, Sherlock G, Chan WC, Greiner TC, Weisenburger DD, Armitage JO, Warnke R, Levy R, Wilson W, Grever MR, Byrd JC, Botstein D, Brown PO, Staudt LM. Distinct types of diffuse large B-cell lymphoma identified by gene expression profiling. *Nature*. 2000;403(6769):503-511.
11. Dave SS, Fu K, Wright GW, Lam LT, Kluin P, Boerma EJ, Greiner TC, Weisenburger DD, Rosenwald A, Ott G, Muller-Hermelink HK, Gascoyne RD, Delabie J, Rimsza LM, Braziel RM, Grogan TM, Campo E, Jaffe ES, Dave BJ, Sanger W, Bast M, Vose JM, Armitage JO, Connors JM, Smeland EB, Kvaloy S, Holte H, Fisher RI, Miller TP, Montserrat E, Wilson WH, Bahl M, Zhao H, Yang L, Powell J, Simon R, Chan WC, Staudt LM, Lymphoma/Leukemia Molecular Profiling P. Molecular diagnosis of Burkitt's lymphoma. *N Engl J Med*. 2006;354(23):2431-2442.
12. Iqbal J, Weisenburger DD, Greiner TC, Vose JM, McKeithan T, Kucuk C, Geng H, Deffenbacher K, Smith L, Dybkaer K, Nakamura S, Seto M, Delabie J, Berger F, Loong F, Au WY, Ko YH, Sng I, Armitage JO, Chan WC, International Peripheral TCLP. Molecular signatures to improve diagnosis in peripheral T-cell lymphoma and prognostication in angioimmunoblastic T-cell lymphoma. *Blood*. 2010;115(5):1026-1036.

13. Lamant L, de Reynies A, Duplantier MM, Rickman DS, Sabourdy F, Giuriato S, Brugieres L, Gaulard P, Espinos E, Delsol G. Gene-expression profiling of systemic anaplastic large-cell lymphoma reveals differences based on ALK status and two distinct morphologic ALK+ subtypes. *Blood*. 2007;109(5):2156-2164.
14. Rosenwald A, Wright G, Leroy K, Yu X, Gaulard P, Gascoyne RD, Chan WC, Zhao T, Haioun C, Greiner TC, Weisenburger DD, Lynch JC, Vose J, Armitage JO, Smeland EB, Kvaloy S, Holte H, Delabie J, Campo E, Montserrat E, Lopez-Guillermo A, Ott G, Muller-Hermelink HK, Connors JM, Braziel R, Grogan TM, Fisher RI, Miller TP, LeBlanc M, Chiorazzi M, Zhao H, Yang L, Powell J, Wilson WH, Jaffe ES, Simon R, Klausner RD, Staudt LM. Molecular diagnosis of primary mediastinal B cell lymphoma identifies a clinically favorable subgroup of diffuse large B cell lymphoma related to Hodgkin lymphoma. *J Exp Med*. 2003;198(6):851-862.
15. Dave SS, Fu K, Wright GW, Lam LT, Kluin P, Boerma EJ, Greiner TC, Weisenburger DD, Rosenwald A, Ott G, Muller-Hermelink HK, Gascoyne RD, Delabie J, Rimsza LM, Braziel RM, Grogan TM, Campo E, Jaffe ES, Dave BJ, Sanger W, Bast M, Vose JM, Armitage JO, Connors JM, Smeland EB, Kvaloy S, Holte H, Fisher RI, Miller TP, Montserrat E, Wilson WH, Bahl M, Zhao H, Yang L, Powell J, Simon R, Chan WC, Staudt LM. Molecular diagnosis of Burkitt's lymphoma. *N Engl J Med*. 2006;354(23):2431-2442.
16. Loi TH, Campain A, Bryant A, Molloy TJ, Lutherborrow M, Turner J, Yang YH, Ma DD. Discriminating lymphomas and reactive lymphadenopathy in lymph node biopsies by gene expression profiling. *BMC Med Genomics*. 2011;4:27.
17. Gascoyne RD, Aoun P, Wu D, Chhanabhai M, Skinnider BF, Greiner TC, Morris SW, Connors JM, Vose JM, Viswanatha DS, Coldman A, Weisenburger DD. Prognostic significance of anaplastic lymphoma kinase (ALK) protein expression in adults with anaplastic large cell lymphoma. *Blood*. 1999;93(11):3913-3921.
18. Laurent C, Do C, Gascoyne RD, Lamant L, Ysebaert L, Laurent G, Delsol G, Brousset P. Anaplastic lymphoma kinase-positive diffuse large B-cell lymphoma: a rare clinicopathologic entity with poor prognosis. *J Clin Oncol*. 2009;27(25):4211-4216.
19. Carey CD, Gusenleitner D, Chapuy B, Kovach AE, Kluk MJ, Sun HH, Crossland RE, Bacon CM, Rand V, Dal Cin P, Le LP, Neuberg D, Sohani AR, Shipp MA, Monti S, Rodig SJ. Molecular classification of MYC-driven B-cell lymphomas by targeted gene expression profiling of fixed biopsy specimens. *J Mol Diagn*. 2015;17(1):19-30.
20. Feuerhake F, Kutok JL, Monti S, Chen W, LaCasce AS, Cattoretti G, Kurtin P, Pinkus GS, de Leval L, Harris NL, Savage KJ, Neuberg D, Habermann TM, Dalla-Favera R, Golub TR, Aster JC, Shipp MA. NFkappaB activity, function, and target-gene signatures in primary mediastinal large B-cell lymphoma and diffuse large B-cell lymphoma subtypes. *Blood*. 2005;106(4):1392-1399.
21. Hummel M, Bentink S, Berger H, Klapper W, Wessendorf S, Barth TF, Bernd HW, Cogliatti SB, Dierlamm J, Feller AC, Hansmann ML, Haralambieva E, Harder L, Hasenclever D, Kuhn M, Lenze D, Lichter P, Martin-Subero JI, Moller P, Muller-Hermelink HK, Ott G, Parwaresch RM, Pott C, Rosenwald A, Rosolowski M, Schwaenen C, Sturzenhockecker B, Szczepanowski M, Trautmann H, Wacker HH, Spang R, Loeffler M, Trumper L, Stein H, Siebert R. Molecular Mechanisms in Malignant Lymphomas Network Project of the Deutsche K. A biologic definition of Burkitt's lymphoma from transcriptional and genomic profiling. *N Engl J Med*. 2006;354(23):2419-2430.
22. Morgan EA, Sweeney MP, Tomoka T, Kopp N, Gusenleitner D, Redd RA, Carey CD, Masamba L, Kamiza S, Pinkus GS, Neuberg DS, Rodig SJ, Milner DA, Jr., Weinstock DM. Targetable subsets of non-Hodgkin lymphoma in Malawi define therapeutic opportunities. *Blood Adv*. 2016;1(1):84-92.
23. Thieblemont C, Nasser V, Felman P, Leroy K, Gazzo S, Callet-Bauchu E, Loriol B, Granjeaud S, Gaulard P, Haioun C, Traverse-Glehen A, Baseggio L, Bertucci F, Birnbaum D, Magrangeas F, Minvielle S, Avet-Loiseau H, Salles G, Coiffier B, Berger F, Houlgatte R. Small

lymphocytic lymphoma, marginal zone B-cell lymphoma, and mantle cell lymphoma exhibit distinct gene-expression profiles allowing molecular diagnosis. *Blood*. 2004;103(7):2727-2737.

24. Huang Y, de Reynies A, de Leval L, Ghazi B, Martin-Garcia N, Travert M, Bosq J, Briere J, Petit B, Thomas E, Coppo P, Marafioti T, Emile JF, Delfau-Larue MH, Schmitt C, Gaulard P. Gene expression profiling identifies emerging oncogenic pathways operating in extranodal NK/T-cell lymphoma, nasal type. *Blood*. 2010;115(6):1226-1237.
25. Iqbal J, Wright G, Wang C, Rosenwald A, Gascoyne RD, Weisenburger DD, Greiner TC, Smith L, Guo S, Wilcox RA, Teh BT, Lim ST, Tan SY, Rimsza LM, Jaffe ES, Campo E, Martinez A, Delabie J, Brazier RM, Cook JR, Tubbs RR, Ott G, Geissinger E, Gaulard P, Piccaluga PP, Pileri SA, Au WY, Nakamura S, Seto M, Berger F, de Leval L, Connors JM, Armitage J, Vose J, Chan WC, Staudt LM, Lymphoma Leukemia Molecular Profiling P, the International Peripheral TcLP. Gene expression signatures delineate biological and prognostic subgroups in peripheral T-cell lymphoma. *Blood*. 2014;123(19):2915-2923.
26. Rosenwald A, Wright G, Chan WC, Connors JM, Campo E, Fisher RI, Gascoyne RD, Muller-Hermelink HK, Smeland EB, Giltane JM, Hurt EM, Zhao H, Averett L, Yang L, Wilson WH, Jaffe ES, Simon R, Klausner RD, Powell J, Duffey PL, Longo DL, Greiner TC, Weisenburger DD, Sanger WG, Dave BJ, Lynch JC, Vose J, Armitage JO, Montserrat E, Lopez-Guillermo A, Grogan TM, Miller TP, LeBlanc M, Ott G, Kvaloy S, Delabie J, Holte H, Krajci P, Stokke T, Staudt LM, Lymphoma/Leukemia Molecular Profiling P. The use of molecular profiling to predict survival after chemotherapy for diffuse large-B-cell lymphoma. *N Engl J Med*. 2002;346(25):1937-1947.
27. Heavican TB, Bouska A, Yu J, Lone W, Amador C, Gong Q, Zhang W, Li Y, Dave BJ, Nairismagi ML, Greiner TC, Vose J, Weisenburger DD, Lachel C, Wang C, Fu K, Stevens JM, Lim ST, Ong CK, Gascoyne RD, Missiaglia E, Lemonnier F, Haioun C, Hartmann S, Pedersen MB, Laginestra MA, Wilcox RA, Teh BT, Yoshida N, Ohshima K, Seto M, Rosenwald A, Ott G, Campo E, Rimsza LM, Jaffe ES, Brazier RM, d'Amore F, Inghirami G, Bertoni F, de Leval L, Gaulard P, Staudt LM, McKeithan TW, Pileri S, Chan WC, Iqbal J. Genetic drivers of oncogenic pathways in molecular subgroups of peripheral T-cell lymphoma. *Blood*. 2019;133(15):1664-1676.
28. Kuppers R, Klein U, Schwering I, Distler V, Brauning A, Cattoretto G, Tu Y, Stolovitzky GA, Califano A, Hansmann ML, Dalla-Favera R. Identification of Hodgkin and Reed-Sternberg cell-specific genes by gene expression profiling. *J Clin Invest*. 2003;111(4):529-537.
29. Iqbal J, Weisenburger DD, Chowdhury A, Tsai MY, Srivastava G, Greiner TC, Kucuk C, Deffenbacher K, Vose J, Smith L, Au WY, Nakamura S, Seto M, Delabie J, Berger F, Loong F, Ko YH, Sng I, Liu X, Loughran TP, Armitage J, Chan WC, International Peripheral TcLP. Natural killer cell lymphoma shares strikingly similar molecular features with a group of non-hepatosplenic gammadelta T-cell lymphoma and is highly sensitive to a novel aurora kinase A inhibitor in vitro. *Leukemia*. 2011;25(2):348-358.
30. Sha C, Barrans S, Care MA, Cunningham D, Tooze RM, Jack A, Westhead DR. Transferring genomics to the clinic: distinguishing Burkitt and diffuse large B cell lymphomas. *Genome Med*. 2015;7(1):64.
31. Scott DW, Abrisqueta P, Wright GW, Slack GW, Mottok A, Villa D, Jares P, Rauert-Wunderlich H, Royo C, Clot G, Pinyol M, Boyle M, Chan FC, Brazier RM, Chan WC, Weisenburger DD, Cook JR, Greiner TC, Fu K, Ott G, Delabie J, Smeland EB, Holte H, Jaffe ES, Steidl C, Connors JM, Gascoyne RD, Rosenwald A, Staudt LM, Campo E, Rimsza LM, Lymphoma/Leukemia Molecular Profiling P. New Molecular Assay for the Proliferation Signature in Mantle Cell Lymphoma Applicable to Formalin-Fixed Paraffin-Embedded Biopsies. *J Clin Oncol*. 2017;35(15):1668-1677.
32. Green TM, Young KH, Visco C, Xu-Monette ZY, Orazi A, Go RS, Nielsen O, Gadeberg OV, Mourits-Andersen T, Frederiksen M, Pedersen LM, Moller MB. Immunohistochemical double-hit score is a strong predictor of outcome in patients with diffuse large B-cell lymphoma treated with rituximab plus cyclophosphamide, doxorubicin, vincristine, and prednisone. *J Clin Oncol*. 2012;30(28):3460-3467.

33. Johnson NA, Slack GW, Savage KJ, Connors JM, Ben-Neriah S, Rogic S, Scott DW, Tan KL, Steidl C, Sehn LH, Chan WC, Iqbal J, Meyer PN, Lenz G, Wright G, Rimsza LM, Valentino C, Brunhoeber P, Grogan TM, Brazier RM, Cook JR, Tubbs RR, Weisenburger DD, Campo E, Rosenwald A, Ott G, Delabie J, Holcroft C, Jaffe ES, Staudt LM, Gascoyne RD. Concurrent expression of MYC and BCL2 in diffuse large B-cell lymphoma treated with rituximab plus cyclophosphamide, doxorubicin, vincristine, and prednisone. *J Clin Oncol*. 2012;30(28):3452-3459.
34. Staiger AM, Ziepert M, Horn H, Scott DW, Barth TFE, Bernd HW, Feller AC, Klapper W, Szczepanowski M, Hummel M, Stein H, Lenze D, Hansmann ML, Hartmann S, Moller P, Cogliatti S, Lenz G, Trumper L, Loffler M, Schmitz N, Pfreundschuh M, Rosenwald A, Ott G, German High-Grade Lymphoma Study G. Clinical Impact of the Cell-of-Origin Classification and the MYC/ BCL2 Dual Expresser Status in Diffuse Large B-Cell Lymphoma Treated Within Prospective Clinical Trials of the German High-Grade Non-Hodgkin's Lymphoma Study Group. *J Clin Oncol*. 2017;35(22):2515-2526.



**Table S8. CLPA Quality control failures by sample age.** Cases are grouped by earliest documented date of biopsy. \*Cases <2006 were included in our cohort because they were documented in the pathology record between 2006-2018 but the actual date of biopsy was earlier. Absolute number of cases that passed and failed in each group are shown with (%) of total cases. Fisher exact test between all cases before 2015 (n=384) and all cases 2015 or later (n=194), p<0.0001.

| <b>Assay Quality Control</b> | <b>Unknown Date</b> | <b>&lt;2006*</b> | <b>2006-2008</b> | <b>2009-2011</b> | <b>2012-2014</b> | <b>≥2015</b> |
|------------------------------|---------------------|------------------|------------------|------------------|------------------|--------------|
| Pass                         | 29 (100)            | 4 (80)           | 84 (76)          | 121 (92)         | 123 (90)         | 190 (98)     |
| Fail                         | 0 (0)               | 1 (20)           | 26 (24)          | 11 (8)           | 14 (10)          | 4 (2)        |

**Table S9.** Candidate Statistical Learning Models for Classification from the Caret Package (<https://topepo.github.io/caret/available-models.html>)

| Method            | Model                                  | Name in Caret | Type | Libraries     | Tuning Parameters                                                             |
|-------------------|----------------------------------------|---------------|------|---------------|-------------------------------------------------------------------------------|
| Tree              | Random Forest                          | rf            | CR   | randomForest  | mtry                                                                          |
| Boosting Tree     | eXtreme Gradient Boosting              | xgbTree       | CR   | xgboost, plyr | nrounds, max_depth, eta, gamma, colsample_bytree, min_child_weight, subsample |
| Boosting Tree     | Stochastic Gradient Boosting           | gbm           | CR   | gbm, plyr     | n.trees, interaction.depth, shrinkage, n.minobsinnode                         |
| Linear DA         | High Dimensional Discriminant Analysis | hdda          | C    | HDclassif     | threshold, model                                                              |
| Linear DA         | Mixture Discriminant Analysis          | mda           | C    | mda           | subclasses                                                                    |
| Penalized DA      | Penalized Discriminant Analysis        | pda           | C    | pda           | lamda                                                                         |
| Modified DA       | Nearest Shrunken Centroids             | pam           | C    | pamr          | threshold                                                                     |
| Least Squares/DA  | Partial Least Squares-DA               | pls           | CR   | pls           | ncomp                                                                         |
| Nearest Neighbors | k-Nearest Neighbors                    | knn           | CR   | knn           | K                                                                             |
| Network           | Neural Network                         | nnet          | CR   | nnet          | size, decay                                                                   |
| Network           | Penalized Multinomial Regression       | multinom      | C    | nnet          | decay                                                                         |
| Kernal Smoothing  | Naive Bayes                            | nb            | C    | klaR          | fL, usekernel, adjust                                                         |
| SVM               | SVM with Polynomial Kernel             | svmPoly       | CR   | kernlab       | degree, scale, C                                                              |
| SVM               | SVM with Radial Basis Function Kernel  | svmRadial     | CR   | kernlab       | sigma, C                                                                      |

\*DA=Discriminant Analysis, CR=classification and regression, C=classification, SVM=support vector machine

**Table S10. Performance characteristics for CLPA-based calling in the blinded validation cohort of biopsies from previously untreated patients.** High probability indicates  $\geq 0.6$ . PPV=positive predictive value NPV=negative predictive value; \*calculated comparing factor to remaining in a one versus all approach; †(specificity+sensitivity)/2; brackets indicate 95% confidence interval.

|                                        | WHO Classification (high probability/indeterminate) |       |     |      |      |     |       |      |      |               |
|----------------------------------------|-----------------------------------------------------|-------|-----|------|------|-----|-------|------|------|---------------|
|                                        | AGG BCL                                             | DLBCL | FL  | HL   | MCL  | MZL | NKTCL | NM   | TCL  | Total         |
| <i>Overall cohort (n=163)</i>          |                                                     |       |     |      |      |     |       |      |      |               |
| <b>Accuracy</b>                        | 50%                                                 | 90%   | 77% | 90%  | 100% | 60% | 100%  | 67%  | 64%  | 86% [80%,91%] |
| <b>Balanced Accuracy**†</b>            | 75%                                                 | 92%   | 88% | 93%  | 100% | 79% | 100%  | 82%  | 81%  |               |
| <b>Sensitivity*</b>                    | 50%                                                 | 90%   | 77% | 90%  | 100% | 60% | 100%  | 67%  | 64%  |               |
| <b>Specificity*</b>                    | 100%                                                | 95%   | 99% | 96%  | 99%  | 98% | 99%   | 98%  | 99%  |               |
| <b>PPV*</b>                            | 100%                                                | 93%   | 83% | 76%  | 94%  | 50% | 93%   | 73%  | 78%  |               |
| <b>NPV*</b>                            | 99%                                                 | 93%   | 98% | 99%  | 100% | 99% | 100%  | 97%  | 97%  |               |
| <i>High-probability cohort (n=135)</i> |                                                     |       |     |      |      |     |       |      |      |               |
| <b>Accuracy</b>                        | 50%                                                 | 95%   | 82% | 100% | 100% | --- | 100%  | 100% | 67%  | 94% [89%,97%] |
| <b>Balanced Accuracy**†</b>            | 75%                                                 | 96%   | 90% | 99%  | 100% | --- | 100%  | 100% | 83%  |               |
| <b>Sensitivity*</b>                    | 50%                                                 | 97%   | 82% | 100% | 100% | --- | 100%  | 100% | 67%  |               |
| <b>Specificity*</b>                    | 100%                                                | 96%   | 98% | 98%  | 100% | --- | 99%   | 100% | 100% |               |
| <b>PPV*</b>                            | 100%                                                | 95%   | 82% | 89%  | 100% | --- | 93%   | 100% | 100% |               |
| <b>NPV*</b>                            | 99%                                                 | 97%   | 98% | 100% | 100% | --- | 100%  | 100% | 98%  |               |

**Table S11. Assay performance based on tissue characteristics among samples in the validation cohort. (A)** Cases are grouped by earliest documented date of biopsy. \*Cases <2006 were included in our cohort because they were documented in the pathology record between 2006-2018 but the actual date of biopsy was earlier. Absolute number of cases that were correctly (Yes) or incorrectly classified (No) in each group are shown with (%) of total cases. Fisher exact test between unknown (n=10), 2006-2008 (n=22), 2009-2011 (n=35), 2012-2014 (n=33) and all cases 2015 or later (n=63), p=0.78. **(B)** Cases are grouped by biopsy site lymph node or secondary lymphoid tissue (SLT) vs extranodal. Absolute number of cases that were correctly (Yes) or incorrectly classified (No) in each group are shown with (%) of total cases. Fisher exact test between nodal/SLT (n=117) and extranodal (n=37), p=0.79.

(A)

| <b>Correct CLPA Classification</b> | <b>Unknown Date</b> | <b>&lt;2006*</b> | <b>2006-2008</b> | <b>2009-2011</b> | <b>2012-2014</b> | <b>≥2015</b> |
|------------------------------------|---------------------|------------------|------------------|------------------|------------------|--------------|
| Yes                                | 9 (90)              | 0 (0)            | 18 (82)          | 30 (86)          | 30 (86)          | 53 (84)      |
| No                                 | 1 (10)              | 0 (0)            | 4 (18)           | 5 (14)           | 3 (9)            | 10 (16)      |

(B)

| <b>Correct CLPA Classification</b> | <b>Nodal/Secondary Lymphoid Tissue</b> | <b>Extranodal</b> |
|------------------------------------|----------------------------------------|-------------------|
| Yes                                | 100 (85%)                              | 31 (84%)          |
| No                                 | 17 (15%)                               | 6 (16%)           |

**Table S12.** Cases from the validation cohort with CLPA-based calls at probability  $\geq 60\%$  that were misclassified compared to IHC.

| Case  | INCAN Diagnosis                        | WHO Diagnosis      | WHO Category | CLPA Result | Comment                                                                                                                                                                                                                                                                                                                                 |
|-------|----------------------------------------|--------------------|--------------|-------------|-----------------------------------------------------------------------------------------------------------------------------------------------------------------------------------------------------------------------------------------------------------------------------------------------------------------------------------------|
| E0039 | Classical Hodgkin Lymphoma             | PTCL, NOS          | TCL          | HL          | Lymphohistiocytic infiltrate with atypical cells concerning for peripheral T cell lymphoma; Hodgkin/Reed-Sternberg cells not initially seen, however re-review of IHC markers showed rare CD30+, CD15+ (subset), PAX5+ (variable), MUM1+, EBV ISH negative cells consistent with classic Hodgkin lymphoma                               |
| E0290 | Lymphoproliferative Disorder           | FL, Grade 3A       | FL           | DLBCL       | Morphological range of follicular lymphoma with predominantly grade 3, but also grade 1-2; all areas including those with a predominance of large cells are associated with FDCs; findings are consistent with follicular lymphoma                                                                                                      |
| E0431 | High grade pleomorphic lymphoma        | ALCL, ALK-negative | TCL          | HL          | Bands of sclerosis with nodules containing large cells showing crescent/"horse-shoe" nuclei; CD30+, CD15+ (subset), CD45+, CD43+, CD4+ (dim), TIA+, granzyme B+, ALK-negative for all B markers; findings are consistent with ALCL, ALK-                                                                                                |
| E0482 | High grade Diffuse Large Cell Lymphoma | PTCL, NOS          | TCL          | NKTCL       | Predominantly necrotic tissue with focal areas of atypical lymphoid cells, with possible angiodestruction; CD3+, CD5-, CD56-, CD8-, TIA-, granzyme B-, perforin-, CD43+, PDL1+; EBV ISH and LMP1 show few scattered cells; findings show a predominant T cell phenotype, however given extensive necrosis antigenicity may be a concern |
| E0578 | Lymphoproliferative Disorder           | DLBCL              | DLBCL        | FL          | Sheets of large pleomorphic B cells with 75% Ki67, c-MYC+, not associated with FDCs; findings consistent with DLBCL                                                                                                                                                                                                                     |
| E0639 | Diffuse Large B Cell Lymphoma          | FL, Grade 1-2      | FL           | DLBCL       | Mixture of small and large cells, predominantly small, however there are areas which show poor fixation which may alter cell size interpretation; BCL6+, BCL2+, CD10-, CD5-, c-MYC (<40%), Ki67 not available; findings compatible with follicular lymphoma grade 1-2                                                                   |
| E0695 | Lymphoproliferative Disorder           | B-LBL              | Agg BCL      | DLBCL       | Monotonous, medium sized B cells with open chromatin; CD45+ (dim), CD20 (negative to dim), PAX5+, CD10+, TdT+; findings consistent with B lymphoblastic lymphoma/leukemia                                                                                                                                                               |
| E0913 | Diffuse Large B Cell Lymphoma          | DLBCL              | DLBCL        | FL          | Sheets of atypical medium sized B cells with 50% Ki67 and no associated FDC networks; findings compatible with DLBCL                                                                                                                                                                                                                    |

**Table S13. Full performance characteristics for CLPA-based calling in the cohort of samples from patients with relapsed/refractory lymphoma (n=39).** WHO classification for each lymphoma based on H&E, IHC, and when indicated FISH is shown in columns and CLPA calls are in rows. Abbreviations: PPV=positive predictive value, NPV=negative predictive value. \*calculated comparing factor to remaining in a one versus all approach; †(specificity+sensitivity)/2; brackets [ ] indicate 95% confidence interval.

|                                | WHO Classification high probability/indeterminate |         |         |         |        |        |        |               |
|--------------------------------|---------------------------------------------------|---------|---------|---------|--------|--------|--------|---------------|
| CLPA-Predicted                 | AGG BCL                                           | DLBCL   | FL      | HL      | MCL    | MZL    | NK-TCL | Total         |
| Agg BCL                        | 0/0                                               |         |         |         |        |        |        | 0             |
| DLBCL                          | 1/0                                               | 17/0    | 2/0     |         |        | 1/0    |        | 21            |
| FL                             |                                                   | 0/1     | 2/1     |         |        |        |        | 4             |
| HL                             |                                                   |         |         | 5/0     |        |        |        | 5             |
| MCL                            |                                                   |         | 0/1     |         | 5/0    |        |        | 6             |
| MZL                            |                                                   |         |         |         |        | 0/0    |        | 0             |
| NK-TCL                         |                                                   |         |         |         |        |        | 1/0    | 1             |
| Nonmalignant                   |                                                   | 0/1     |         |         |        |        |        | 1             |
| TCL                            |                                                   |         |         | 0/1     |        |        |        | 1             |
| <b>Total Overall</b>           | 1                                                 | 19      | 6       | 6       | 5      | 1      | 1      | 39            |
| Accuracy                       | 0%                                                | 89%     | 50%     | 83%     | 100%   | 0%     | 100%   | 79% [64%,91%] |
| Balanced Accuracy*†            | 50%                                               | 85%     | 73%     | 92%     | 99%    | 50%    | 100%   |               |
| Sensitivity*                   | 0%                                                | 89%     | 50%     | 83%     | 100%   | 0%     | 100%   |               |
| Specificity*                   | 100%                                              | 80%     | 97%     | 100%    | 97%    | 100%   | 100%   |               |
| PPV*                           | ---                                               | 81%     | 75%     | 100%    | 83%    | ---    | 100%   |               |
| NPV*                           | 97%                                               | 89%     | 91%     | 97%     | 100%   | 97%    | 100%   |               |
| <b>Total indeterminate</b>     | 0 (0%)                                            | 2 (11%) | 2 (33%) | 1 (17%) | 0 (0%) | 0 (0%) | 0 (0%) | 5 (13%)       |
| <i>High Probability cohort</i> |                                                   |         |         |         |        |        |        |               |
| <b>Total Evaluable</b>         | 1                                                 | 17      | 4       | 5       | 5      | 1      | 1      | 34            |
| Accuracy                       | 0%                                                | 100%    | 50%     | 100%    | 100%   | 0%     | 100%   | 88% [73%,97%] |
| Balanced Accuracy*†            | 50%                                               | 88%     | 75%     | 100%    | 100%   | 50%    | 100%   |               |
| Sensitivity*                   | 0%                                                | 100%    | 50%     | 100%    | 100%   | 0%     | 100%   |               |
| Specificity*                   | 100%                                              | 76%     | 100%    | 100%    | 100%   | 100%   | 100%   |               |
| PPV*                           | ---                                               | 81%     | 100%    | 100%    | 100%   | ---    | 100%   |               |
| NPV*                           | 97%                                               | 100%    | 94%     | 100%    | 100%   | 97%    | 100%   |               |

**Table S14. Detailed cost analysis for assay reagents and supplies in Guatemala. A.** Analysis conditions **B.** Quantity of reagents per reactions **C.** Quantity of reagents per 96 reactions **D.** Laboratory consumables **E.** Additional reagents **F.** Total assay cost. Prices are listed in Guatemalan quetzale (Q) and U.S. dollars (\$)

**A**

|                                                                                                            |
|------------------------------------------------------------------------------------------------------------|
| Runs of 95 samples + 1 negative control / week                                                             |
| Using the cartridge version of 6 months lifetime                                                           |
| Using 3 Aluminum foil per run (96 reactions)                                                               |
| Using 2 Plastic foil per run (96 reactions)                                                                |
| Using 1 cathode buffer container every two weeks, because that is the cathode buffer lifetime              |
| Using 16 Septa for cathode container buffer every two weeks                                                |
| Using 96 Septa for plate every run                                                                         |
| Using 10 uL tips to introduce the scrolls                                                                  |
| The price in dollars was calculated with the official exchange rate of the Bank of Guatemala at 12/10/2019 |

**B**

**C**

| <b>Reagent</b>  | <b>uL/well</b> |                         |
|-----------------|----------------|-------------------------|
| Lymphoma Mix B  | 15             |                         |
| Lymphoma Mix A  | 15             |                         |
| DirectMix C     | 5              |                         |
| DxBuffer1       | 50             |                         |
| Buffer TE       | 17             |                         |
| Direct Beads    | 5              |                         |
| Direct Wash     | 540            |                         |
| DirectTaq       | 5              |                         |
| DxPrime         | 5              |                         |
| GeneScan 600LIZ | 0.5            |                         |
| Formamide       | 17.5           |                         |
| <b>Reagent</b>  |                | <b>uL /96 reactions</b> |
| Lymphoma Mix B  |                | 1444.5                  |
| Lymphoma Mix A  |                | 1444.5                  |
| DirectMix C     |                | 481.5                   |

|                 |         |
|-----------------|---------|
| DxBuffer1       | 4815    |
| Buffer TE       | 1637.1  |
| Direct Beads    | 481.5   |
| Direct Wash     | 52000   |
| DirectTaq       | 481.5   |
| DxPrime         | 481.5   |
| GeneScan 600LIZ | 48.15   |
| Formamide       | 1685.25 |

**D**

| Lab Consumable                                          | Units of measurement (UOM) | UOM Qty | Price per UOM (Local currency) | 96 Units/reaction | Price per 96 reactions (Local currency) | Price per 96 reactions (\$) |
|---------------------------------------------------------|----------------------------|---------|--------------------------------|-------------------|-----------------------------------------|-----------------------------|
| 96 well PCR plate                                       | Pack                       | 10      | Q 663.08                       | 2                 | Q 132.62                                | \$16.81                     |
| 2 mL tubes                                              | Pack                       | 250     | Q 205.00                       | 193               | Q 158.26                                | \$20.06                     |
| Cathode Buffer Container (125 injections per container) | Box                        | 4       | Q 1,413.96                     | 0.5               | Q 176.75                                | \$22.40                     |
| Seq Plate                                               | Box                        | 10      | Q 663.08                       | 1                 | Q 66.31                                 | \$8.40                      |
| 10 uL tips                                              | pack                       | 960     | Q 731.28                       | 480               | Q 365.64                                | \$46.34                     |
| 20 uL tips                                              | pack                       | 960     | Q 731.28                       | 384               | Q 292.51                                | \$37.07                     |
| 100 uL tips                                             | pack                       | 960     | Q 731.28                       | 288               | Q 219.38                                | \$27.81                     |
| 200 uL tips                                             | pack                       | 960     | Q 731.28                       | 864               | Q 658.15                                | \$83.42                     |
| 1000 uL tips                                            | pack                       | 960     | Q 731.28                       | 6                 | Q 4.57                                  | \$0.58                      |
| Cartridge (1000 reactions)                              | box                        | 1000    | Q 19,219.20                    | 96                | Q 1,845.04                              | \$233.85                    |
| Reagent reservoir                                       | pack                       | 10      | Q 186.00                       | 1                 | Q 18.60                                 | \$2.36                      |
| Plastic Foil                                            | box                        | 100     | Q 1,553.88                     | 2                 | Q 31.08                                 | \$3.94                      |
| 16 Septa for Cathode buffer container                   | pack                       | 20      | Q 2,814.48                     | 1                 | Q 140.72                                | \$17.84                     |
| Septa for Plate                                         | pack                       | 20      | Q 3,700.00                     | 1                 | Q 185.00                                | \$23.45                     |
| Aluminum Foil                                           | pack                       | 100     | Q 2,016.00                     | 3                 | Q 60.48                                 | \$7.67                      |
| Gloves                                                  | box                        | 100     | Q 55.00                        | 8                 | Q 4.40                                  | \$0.56                      |
| <b>Consumable price per 96 reactions</b>                |                            |         |                                |                   | <b>Q 4,359.51</b>                       | <b>\$552.54</b>             |

**E**

| Reagent         | Units of measurement (UOM) | UOM Qty in uL | Price per UOM (Local currency) | uL used per 96 reactions | Price per 96 reactions (Local currency) | Price per 96 reactions (\$) |
|-----------------|----------------------------|---------------|--------------------------------|--------------------------|-----------------------------------------|-----------------------------|
| GeneScan 600LIZ | 2 tubes of 200 uL each     | 400           | Q 4,526.11                     | 48.15                    | Q 544.83                                | \$69.05                     |
| Formamide       | bottle                     | 5000          | Q 471.74                       | 1685.25                  | Q 159.00                                | \$20.15                     |



|                                           |  |  |  |  |                 |                |
|-------------------------------------------|--|--|--|--|-----------------|----------------|
| <b>Reagent price per<br/>16 reactions</b> |  |  |  |  | <b>Q 703.83</b> | <b>\$89.21</b> |
|-------------------------------------------|--|--|--|--|-----------------|----------------|

**F**

|                                                                       | Local Currency    | U.S. Dollars    |
|-----------------------------------------------------------------------|-------------------|-----------------|
| <b>Total Cost per 96 reactions</b>                                    | <b>Q 5,063.34</b> | <b>\$641.74</b> |
| <b>Cost per patient (in runs of 95 patients + 1 negative control)</b> | <b>Q 53.30</b>    | <b>\$6.76</b>   |

## Supplementary Figure Legends

**Figure S1.** IHC and gene expression assessment. **A.** Examples of assessments from tissue microarray (TMA). Top left, H&E of EBV+ Diffuse large B cell lymphoma (DLBCL). Top middle, *in situ* hybridization for EBV in DLBCL. Top right, CD20 expression in EBV+ DLBCL. Bottom left, H&E of classic Hodgkin Lymphoma (cHL). Bottom middle, *in situ* hybridization for EBV in cHL. Bottom right, CD30 expression in cHL. **B.** CLPA assay measures gene expression directly from 6-10 um FFPE section through same tube RNA isolation and by chemical ligation of probes bound to the RNA followed by streptavidin-conjugated paramagnetic bead-capture. PCR is performed so that each product has a unique size. Quantification of the size-differentiated, ligated probe amplification products is performed using a capillary electrophoresis instrument. SS, spacer sequence; TS, target sequence; UFP, universal forward primer; URP, universal reverse primer

**Figure S2.** **A.** Histograms of normalized CLPA expression for each gene for all pre-treatment cases in the test and validation sets (n=560) **B.** Boxplots of normalized CLPA expression values by WHO diagnosis. Horizontal lines indicate the median, boxes represent the interquartile range (IQR) with error bars extending to 1.5 times the IQR, and dots indicating value >1.5 time the IQR. **C.** Spearman correlation plot matrix where blue indicates positive correlation coefficient and red indicates negative correlation coefficient. Color intensity and the size of the circle are proportional to the correlation coefficients.

**Figure S3.** **A.** Spearman correlation plot matrix for the relapsed cases (n=39) where blue indicates positive correlation coefficient and red indicates negative correlation coefficient. Color intensity and the size of the circle are proportional to the correlation coefficients.

**B.** Boxplots of normalized CLPA expression values by diagnosis for the relapse cases (n=39). Horizontal lines indicate the median, boxes represent the interquartile range (IQR) with error bars extending to 1.5 times the IQR, and dots indicating value >1.5 times the IQR.

**A**

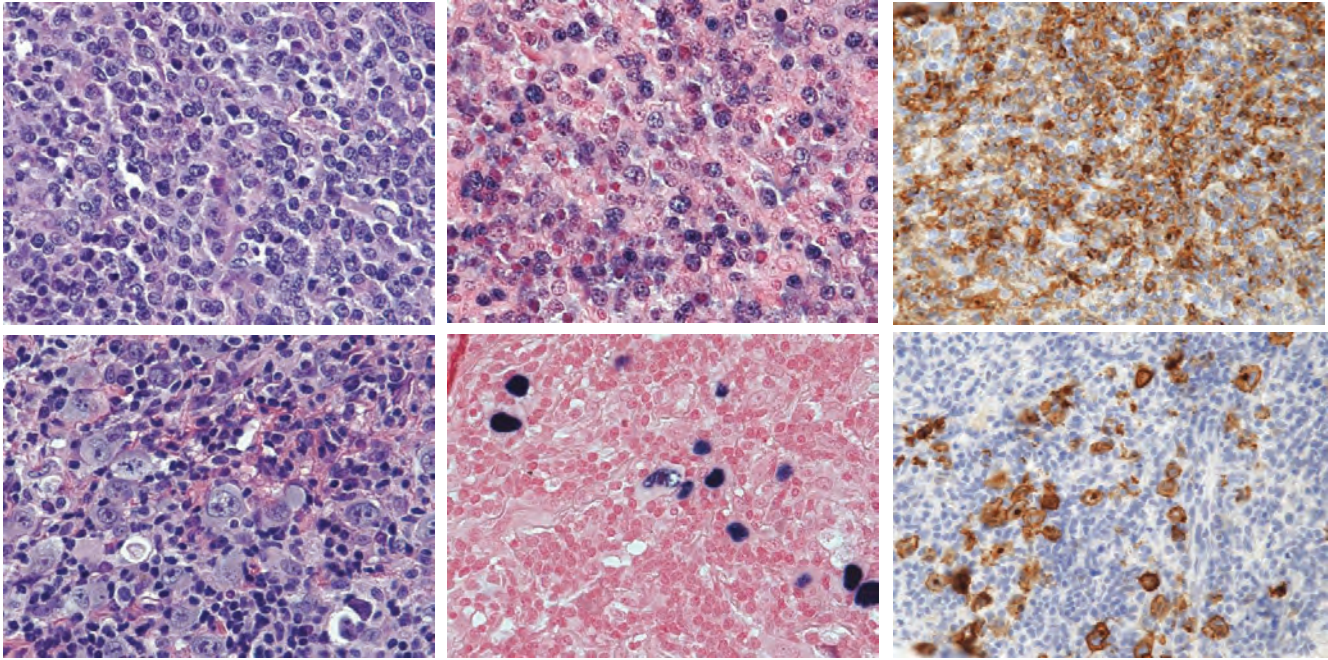

**B**

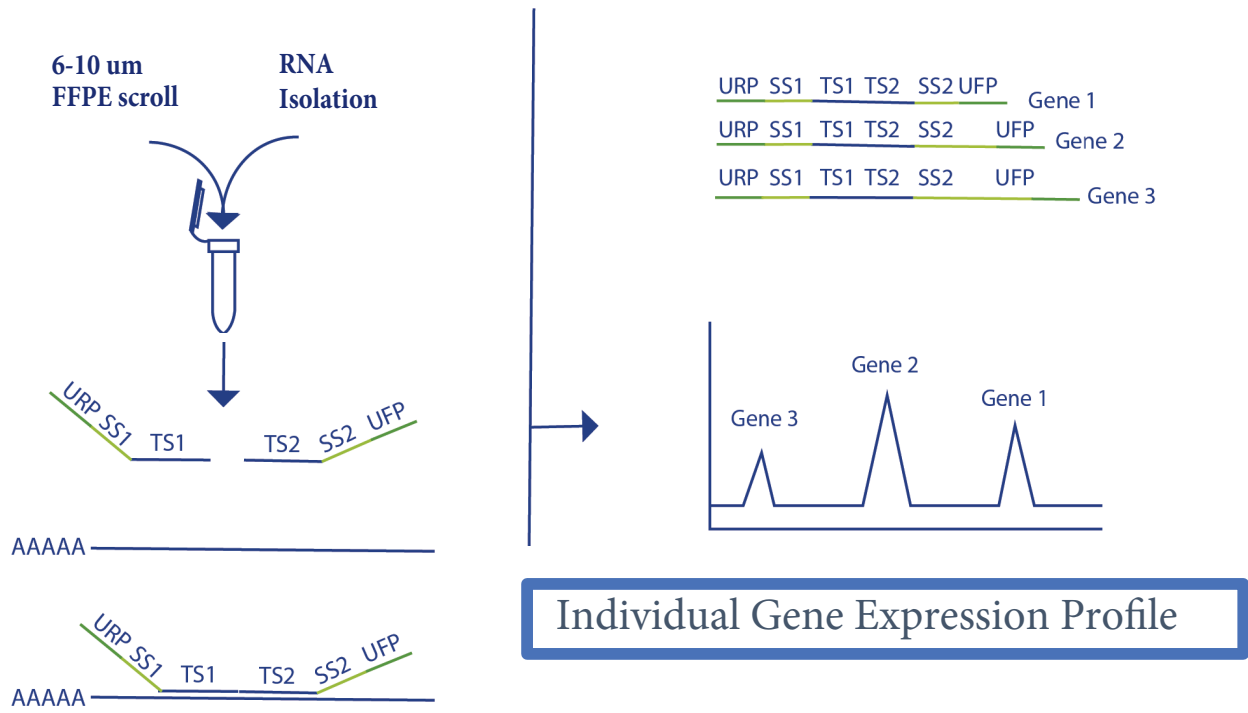

Figure S1

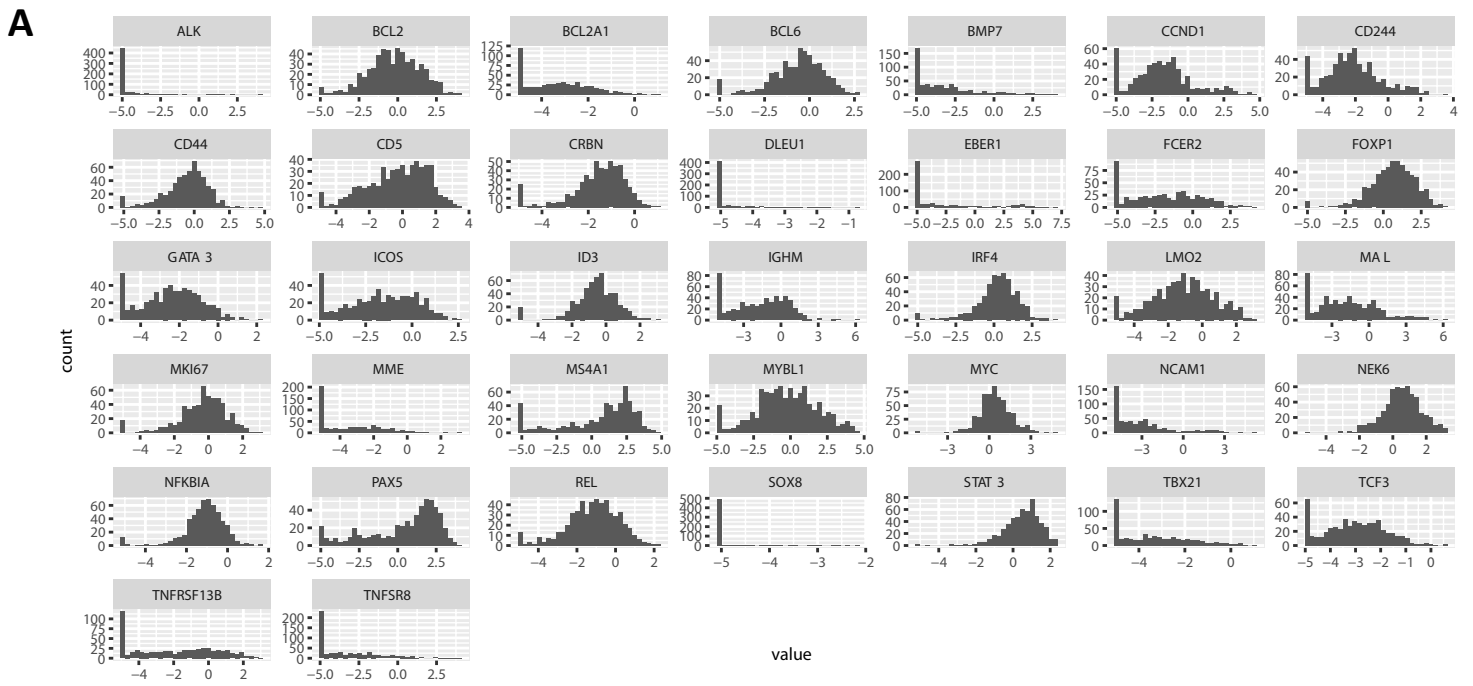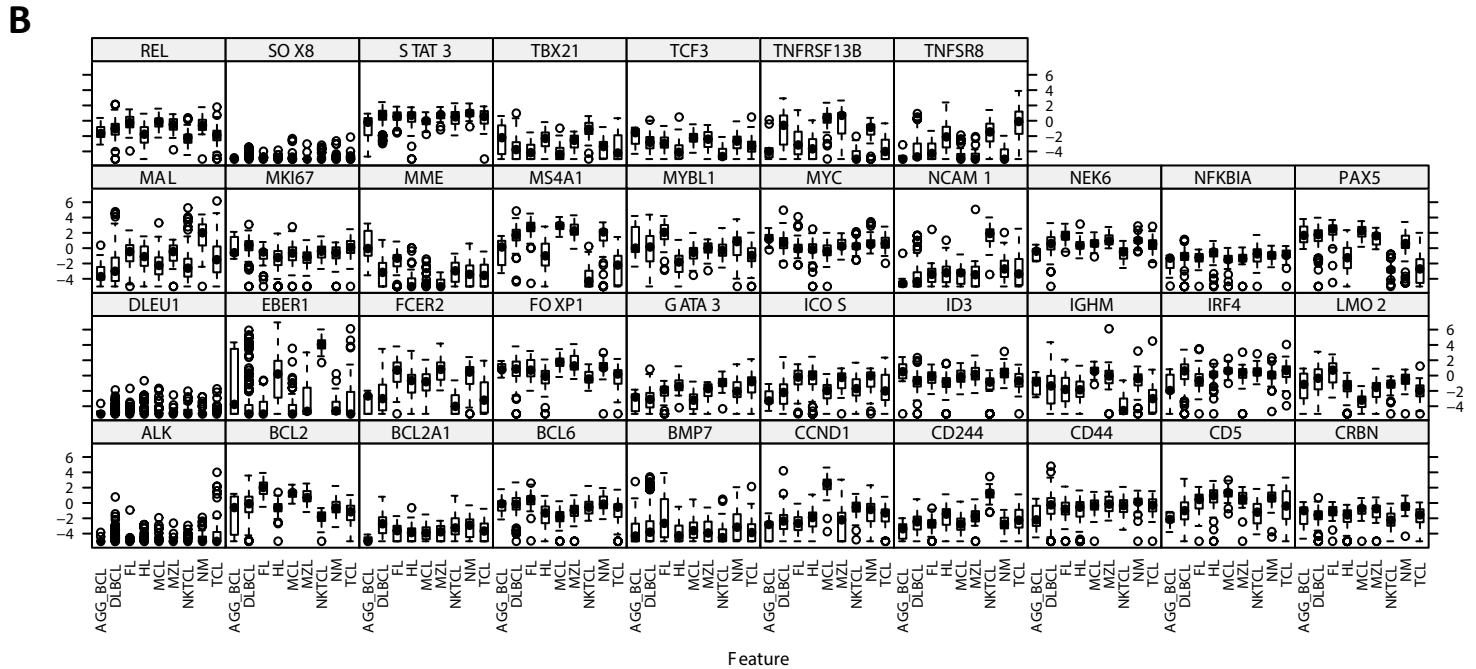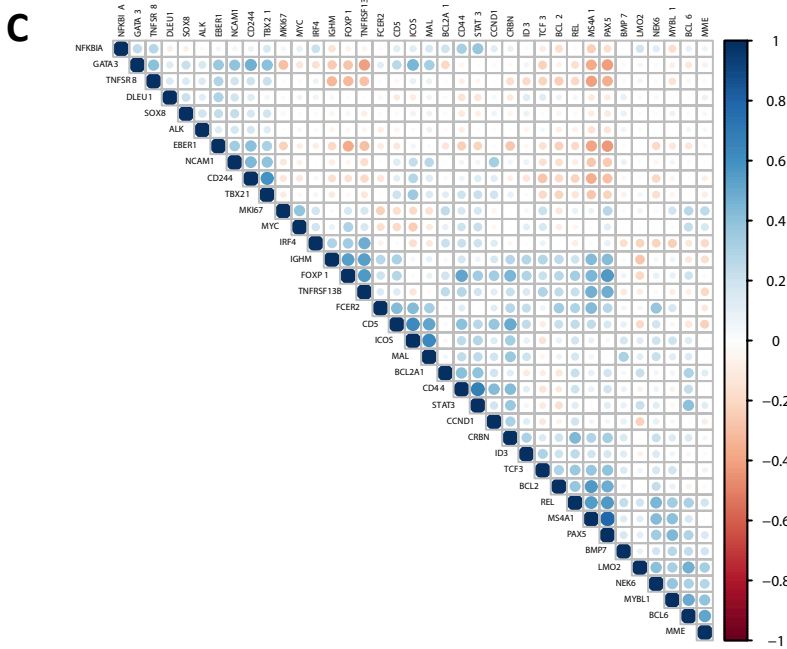

Figure S2

A

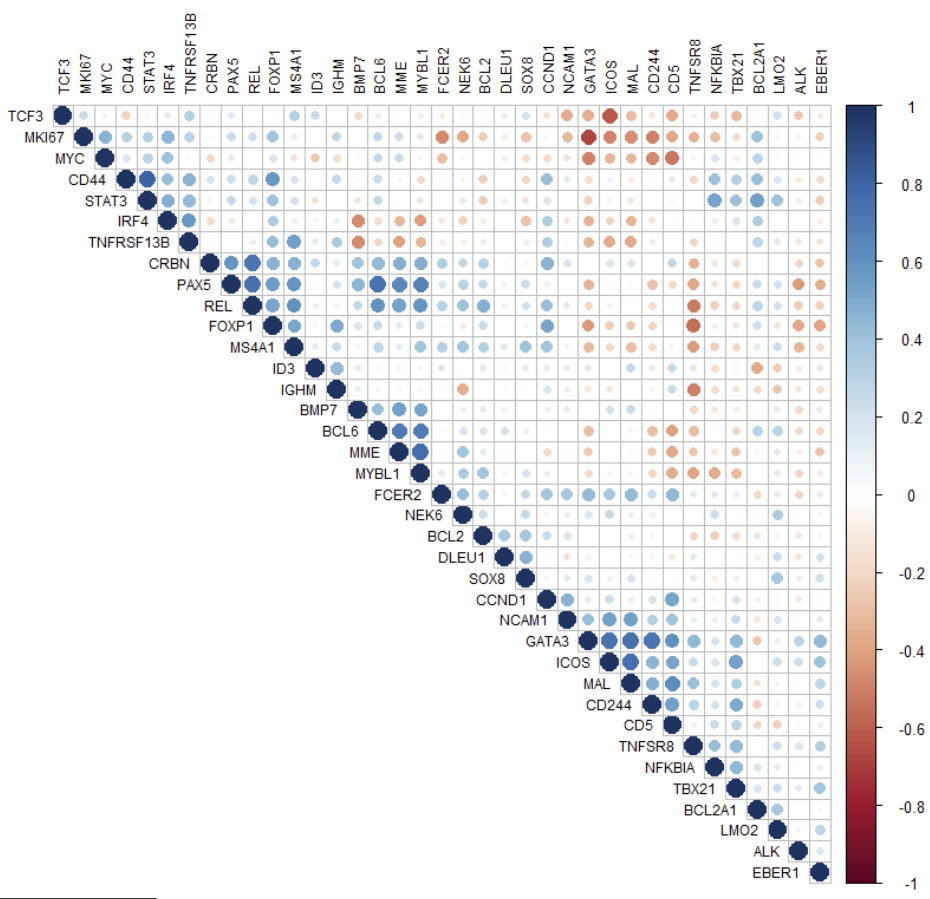

B

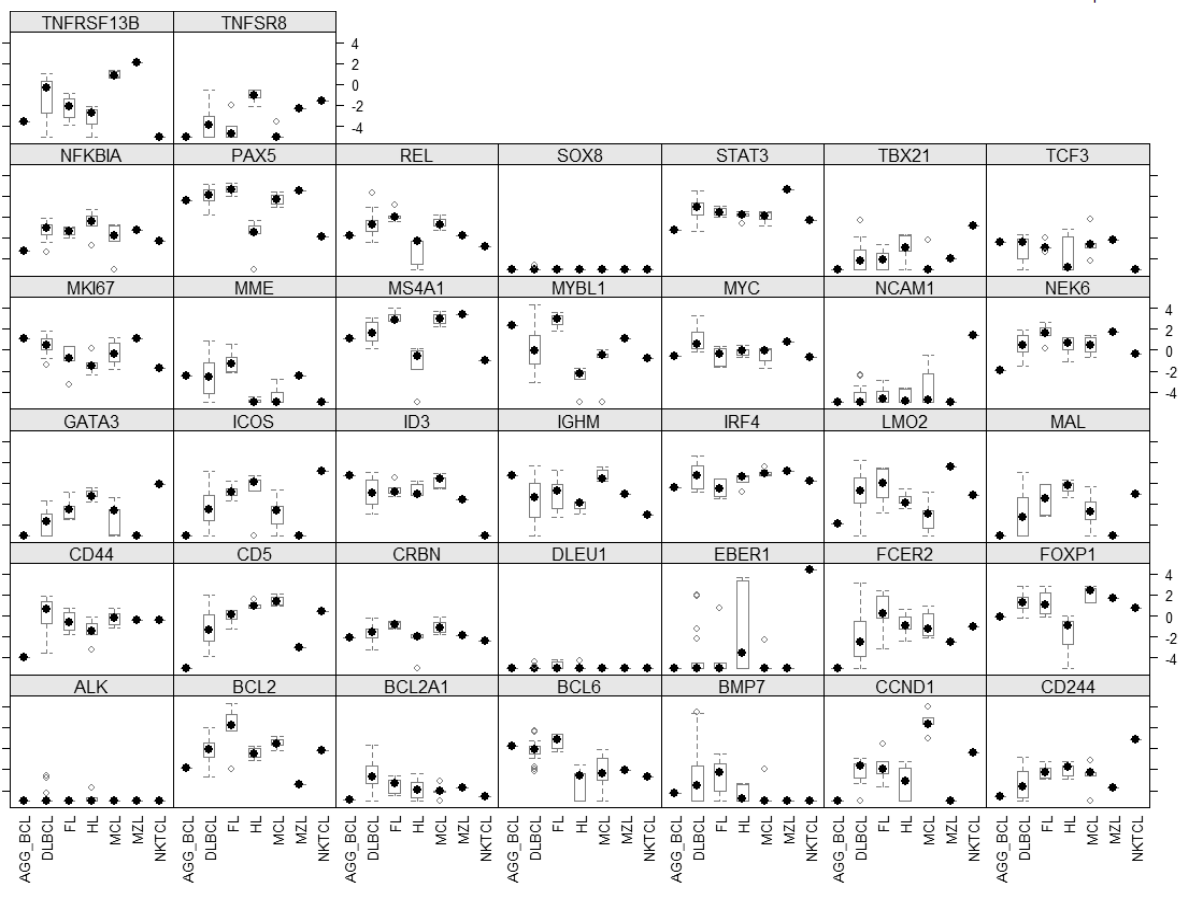

Figure S3
